# Supplementary material
Source: PubMed Central journal article supplement (PMC2581565)

Supp. Fig. 1. GTPCH activity and feedback inhibition in the presence of TH are unaffected when neither protein is phosphorylated. *A*, We assayed recombinant nonphosphorylated GTPCH isoform C in the presence of varying concentrations of recombinant nonphosphorylated TH. No increase in GTPCH activity was observed confirming that phosphorylation of GTPCH and TH is necessary for biochemical consequence. *B*, Inhibition of recombinant nonphosphorylated GTPCH isoform C by 0.7 mM DAHP (BH<sub>4</sub> mimic) cannot be alleviated by the presence of TH when neither GTPCH nor TH are in the phosphorylated state. GTPCH activity is expressed as nmoles of dihydroneopterin triphosphate (H<sub>2</sub>NTP) generated per min, per mg of recombinant GTPCH protein.

Supplemental Figure 1

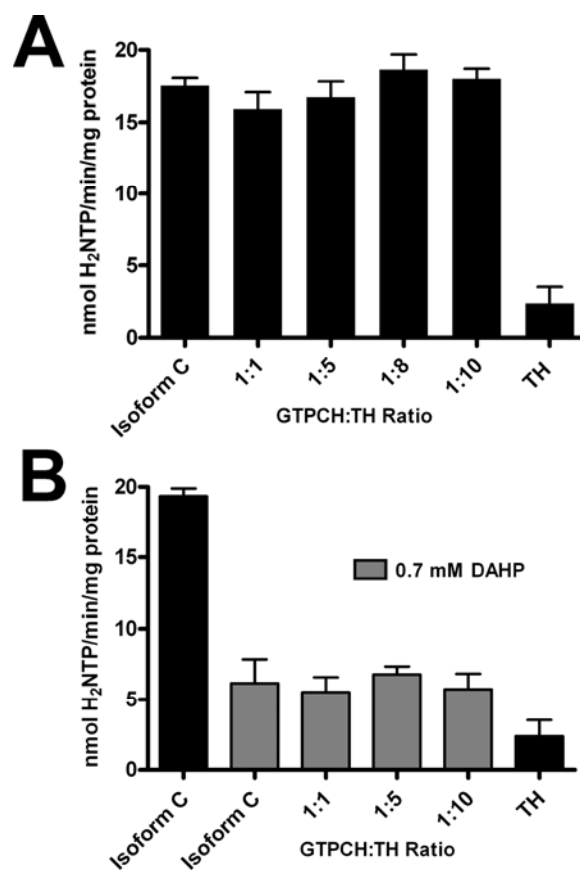

Supplement: M802552200_1.pdf [file M802552200_1.pdf]
